# Supplementary material for: Effect of interactions of PVC and biomass components on the formation of polycyclic aromatic hydrocarbons (PAH) during fast co-pyrolysis
Source: Royal Society of Chemistry journal article supplement (doi:10.1039/c4ra10639c), 2015-01-01
Supplement: c4ra10639c1.pdf [file c4ra10639c1.pdf]

## Supplementary data

### Effect of interactions of PVC and biomass components on formation of polycyclic aromatic hydrocarbons (PAH) during fast co-pyrolysis

Hui Zhou,<sup>a</sup> Chunfei Wu,<sup>\*b</sup> Jude A. Onwudili,<sup>b</sup> Aihong Meng,<sup>a</sup> Yanguo Zhang<sup>\*a</sup> and Paul T. Williams<sup>\*b</sup>

<sup>a</sup> Key Laboratory for Thermal Science and Power Engineering of Ministry of Education, Department of Thermal Engineering, Tsinghua University, Beijing 100084, P.R. China.

<sup>b</sup> Energy Research Institute, University of Leeds, Leeds LS2 9JT, UK.

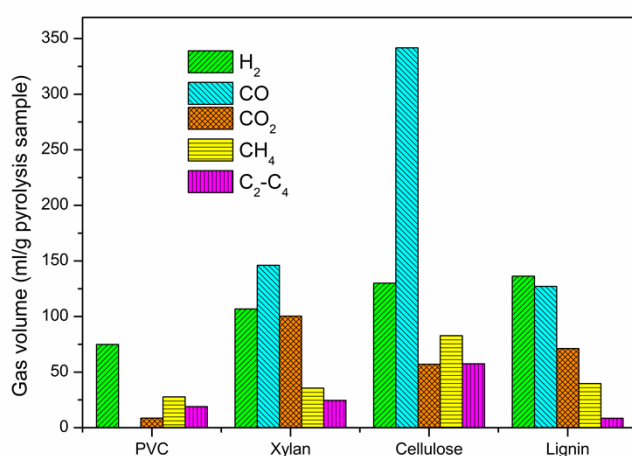

**Fig. S1.** Gas production from pyrolysis of single samples.

The gas production from the pyrolysis of the four samples (hemi-cellulose, cellulose, lignin, and PVC) is tested by GC (Fig. S1). At 800 °C, xylan, cellulose, and lignin produced similar H<sub>2</sub> yields (~100 ml/g sample). Cellulose produced the highest volume of CO (~350 ml/g sample), the high CO generation from cellulose pyrolysis was also reported by Banyasz et al (2001). CO was generated from C-O-C (Ferdous et al., 2002; Greenwood et al., 2002), which was abundant in the structure of cellulose. Xylan generated the most CO<sub>2</sub> (~150 ml/g sample), because of the -COO- unit in the monomer. Cellulose also generated the most CH<sub>4</sub> and C<sub>2</sub>-C<sub>4</sub> (Fig. S1). The pyrolysis of PVC produced only a small amount of gas apart from HCl.

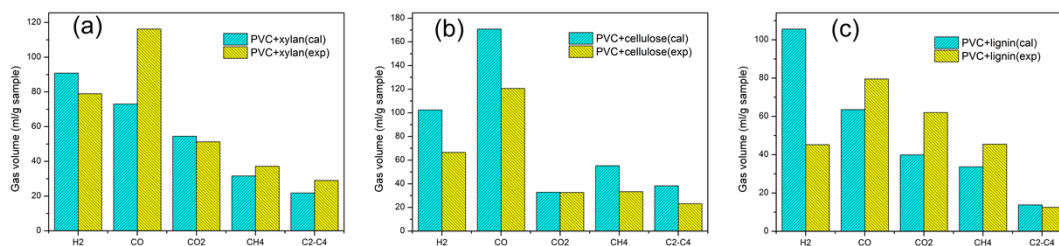

**Fig. S2.** Gas products of mixtures of PVC and biomass components (a, PVC+xylan; b, PVC+cellulose; c, PVC+lignin).

The ratio of PVC and biomass components is 1:1 (50%:50%). As shown in Fig. S2, experimental results (exp) were from the co-pyrolysis of PVC and biomass components; calculated results (cal) were from the superposition of the results of single components in the same weight percentage of real mixtures. The interaction effect of PVC and biomass components on gas products were complicated, as shown in Fig. S2. The interaction of PVC and biomass components decreased H<sub>2</sub> yield. The interaction of PVC and xylan or lignin increased CO yield, while the interaction of PVC and cellulose decreased CO yield. Meanwhile, CO<sub>2</sub> yield was increased from 39.9 to 62.0 ml g<sup>-1</sup> sample due to the interaction of PVC and lignin.

## References

- Banyasz, J.L., Li, S., Lyons-Hart, J., Shafer, K.H., 2001. Gas evolution and the mechanism of cellulose pyrolysis. *Fuel* 80, 1757-1763.
- Ferdous, D., Dalai, A.K., Bej, S.K., Thring, R.W., 2002. Pyrolysis of lignins: Experimental and kinetics studies. *Energ. Fuel.* 16, 1405-1412.
- Greenwood, P.F., van Heemst, J.D.H., Guthrie, E.A., Hatcher, P.G., 2002. Laser micro-pyrolysis GC-MS of lignin. *J. Anal. Appl. Pyrol.* 62, 365-373.
